# Supplementary material for: Anti-Aging Properties of Chitosan-Based Hydrogels Rich in Bilberry Fruit Extract
Source: MDPI journal article supplement (doi:10.3390/antiox13010105), 2024-01-15
Supplement: s1 [file s1]

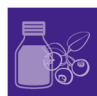

# Anti-Aging Properties of Chitosan-Based Hydrogels Rich in Bilberry Fruit Extract

Elżbieta Studzińska-Sroka <sup>1</sup>, Magdalena Paczkowska-Walendowska <sup>1,\*</sup>, Cansu Erdem <sup>2</sup>, Jarosław Paluszcak <sup>3</sup>, Robert Kleszcz <sup>3</sup>, Marta Hoszman-Kulisz <sup>1</sup> and Judyta Cielecka-Piontek <sup>1</sup>

<sup>1</sup> Department of Pharmacognosy and Biomaterials, Poznan University of Medical Sciences, Rokietnicka 3 Str, 60-806 Poznań, Poland; elastudzinska@ump.edu.pl (E.S.-S.); martahoszman@wp.pl (M.H.-K.); jpiontek@ump.edu.pl (J.C.-P.)

<sup>2</sup> Department Pharmaceutical Chemistry, Ege Üniversitesi, 35040 İzmir, Turkey; cansueerdem@gmail.com

<sup>3</sup> Department of Pharmaceutical Biochemistry, Poznan University of Medical Sciences, Rokietnicka 3 Str, 60-806 Poznań, Poland; paluszcza@ump.edu.pl (J.P.); kleszcz@ump.edu.pl (R.K.)

\* Correspondence: mpaczkowska@ump.edu.pl

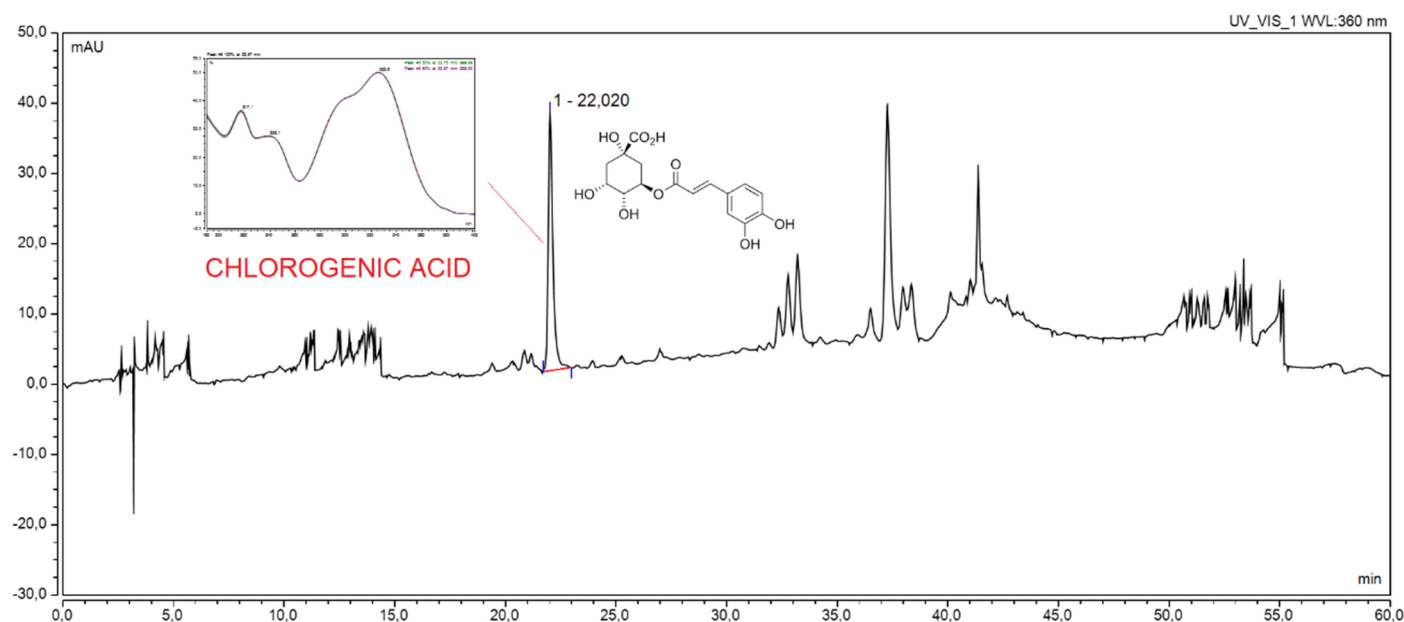

**Figure S1.** Chromatogram of acetone-water extract at concentration 0.1 g/ml.

**Table S1.** Validation parameters of HPLC method

| Parameter                                               | Chlorogenic acid                |
|---------------------------------------------------------|---------------------------------|
| Linearity: $y = ax + b$                                 |                                 |
| $a \pm S_a$                                             | $0.5068 \pm 0.0054$             |
| $b \pm S_b$                                             | insignificant ( $\alpha=0.05$ ) |
| Correlation coefficient (r)                             | 0.9998                          |
| Range of linearity [ $\mu\text{g/mL}$ ]                 | 21.2–212.0                      |
| Intra-day precision, RSD (<5% required) = repeatability |                                 |
| The lowest                                              | 2.46                            |
| The middle                                              | 0.04                            |
| The lowest                                              | 0.13                            |
| Limit of detection (LOD) [ $\mu\text{g/mL}$ ]           | 5.21                            |
| Limit of quantification (LOQ) [ $\mu\text{g/mL}$ ]      | 15.79                           |

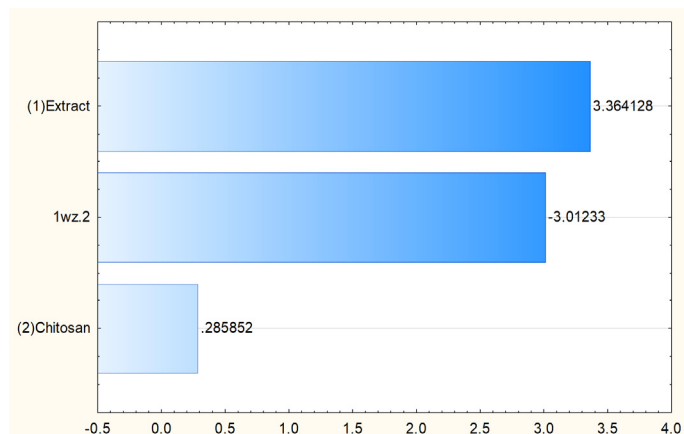

(a)

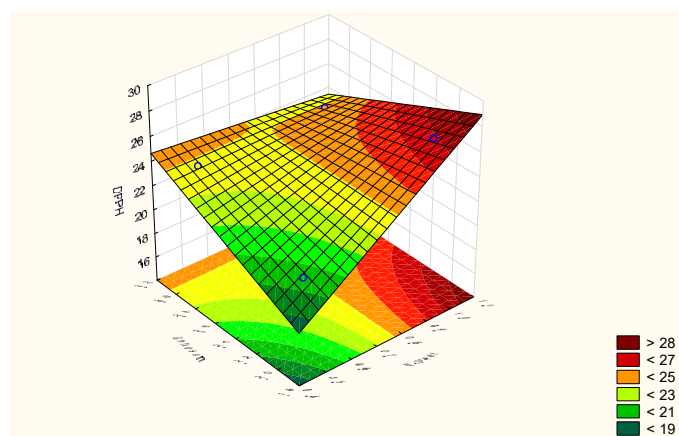

(b)

**Figure S2.** Statistical analysis for antioxidant activity: (a) Pareto plot of standardized effects; (b) Response surface plots presenting the dependence of extract concentration and chitosan concentration on hydrogel antioxidant activity.

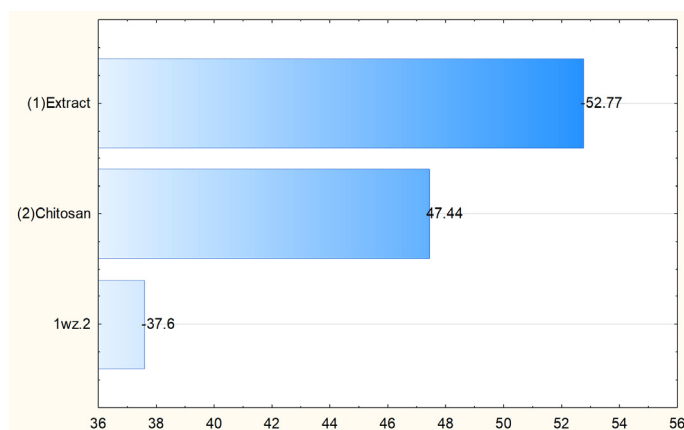

(a)

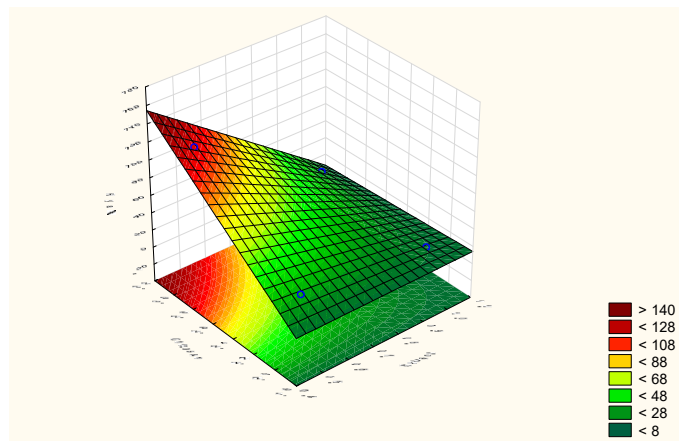

(b)

**Figure S3.** Statistical analysis for anti-inflammatory activity: (a) Pareto plot of standardized effects; (b) Response surface plots presenting the dependence of extract concentration and chitosan concentration on hydrogel anti-hyaluronidase activity.

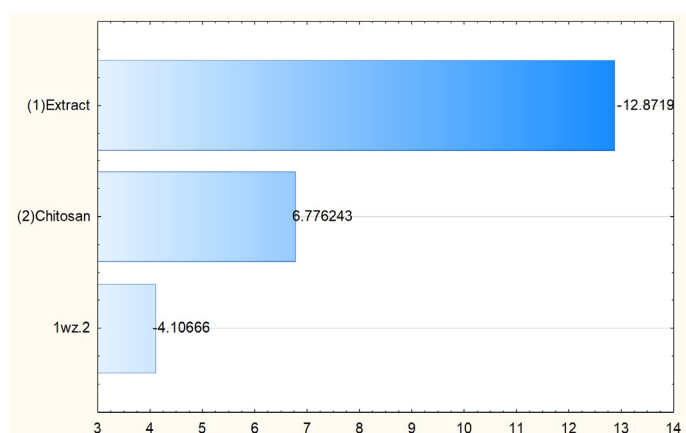

(a)

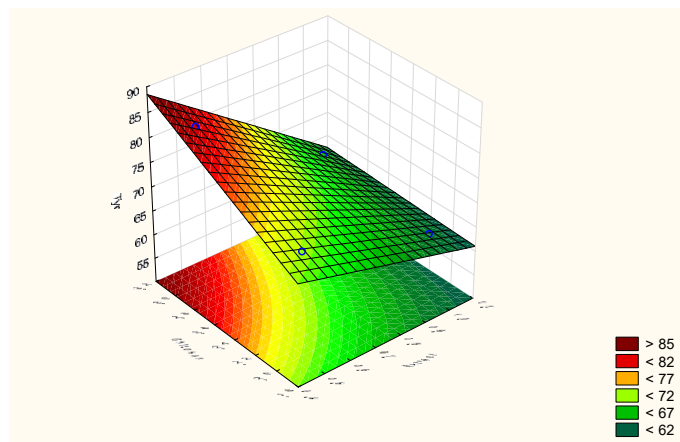

(b)

**Figure S4.** Statistical analysis for anti-tyrosinase activity: (a) Pareto plot of standardized effects; (b) Response surface plots presenting the dependence of extract concentration and chitosan concentration on hydrogel anti-tyrosinase activity.

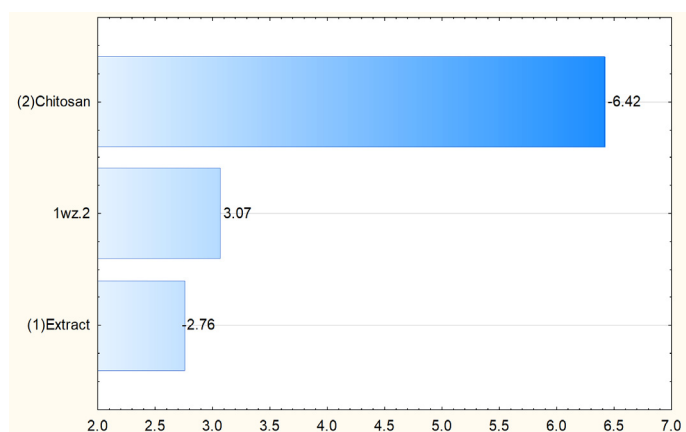

(a)

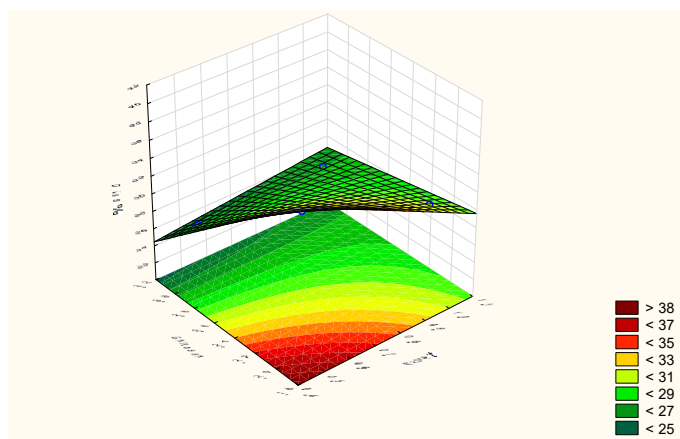

(b)

**Figure S5.** Statistical analysis for release studies: (a) Pareto plot of standardized effects for chlorogenic acid release (in %); (b) Response surface plots presenting the dependence of extract concentration and chitosan concentration on the chlorogenic acid release from hydrogels (in %).

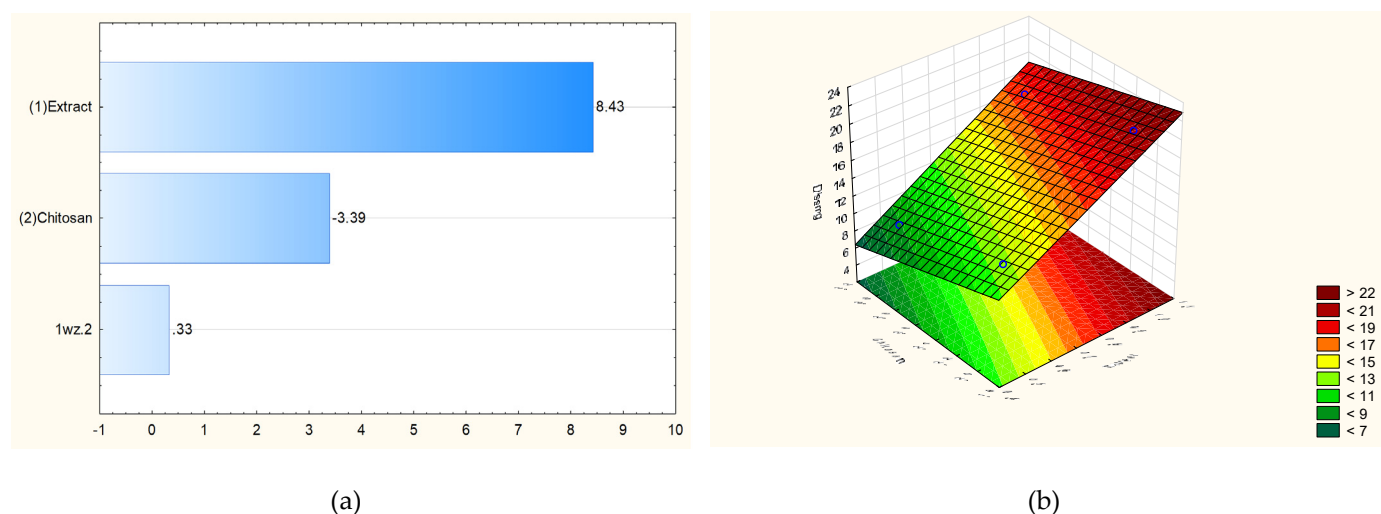

**Figure S6.** Statistical analysis for release studies: (a) Pareto plot of standardized effects for chlorogenic acid release (in mg/cm<sup>2</sup>); (b) Response surface plots presenting the dependence of extract concentration and chitosan concentration on the chlorogenic acid release from hydrogels (in mg/cm<sup>2</sup>).

**Table S2.** Comparison of chlorogenic acid release profiles (expressed in %) from H1-H4 hydrogels using factors  $f_1$  and  $f_2$

|    | H1                         | H2                         | H3                         | H4                         |
|----|----------------------------|----------------------------|----------------------------|----------------------------|
| H1 |                            | $f_1=11.00$<br>$f_2=82.45$ | $f_1=27.11$<br>$f_2=63.07$ | $f_1=24.74$<br>$f_2=64.96$ |
| H2 | $f_1=11.00$<br>$f_2=82.45$ |                            | $f_1=18.54$<br>$f_2=72.66$ | $f_1=15.99$<br>$f_2=75.58$ |
| H3 | $f_1=27.11$<br>$f_2=63.07$ | $f_1=18.54$<br>$f_2=72.66$ |                            | $f_1=3.81$<br>$f_2=97.88$  |
| H4 | $f_1=24.74$<br>$f_2=64.96$ | $f_1=15.99$<br>$f_2=75.58$ | $f_1=3.81$<br>$f_2=97.88$  |                            |

similar profiles marked in red

**Table S3.** Parameters of mathematical models fitted to the release profiles (expressed in mg/cm<sup>2</sup>) of formulations H1-H4

| Formulation No. | Mathematical model |                |                     |                |                 |                |                          |      |
|-----------------|--------------------|----------------|---------------------|----------------|-----------------|----------------|--------------------------|------|
|                 | Zero-order kinetic |                | First-order kinetic |                | Higuchi kinetic |                | Korsmeyer-Peppas kinetic |      |
|                 | K                  | R <sup>2</sup> | K                   | R <sup>2</sup> | K               | R <sup>2</sup> | R <sup>2</sup>           | n    |
| H1              | <b>0.53</b>        | <b>0.99</b>    | 0.15                | 0.57           | 1.09            | 0.54           | 0.44                     | 0.37 |
| H2              | <b>0.86</b>        | <b>0.99</b>    | 0.15                | 0.64           | 1.87            | 0.59           | 0.67                     | 0.42 |
| H3              | <b>0.37</b>        | <b>0.99</b>    | 0.14                | 0.62           | 0.76            | 0.53           | 0.38                     | 0.30 |
| H4              | <b>0.74</b>        | <b>0.99</b>    | 0.15                | 0.67           | 1.53            | 0.55           | 0.59                     | 0.39 |

the most fitting mathematical model is shown in bold

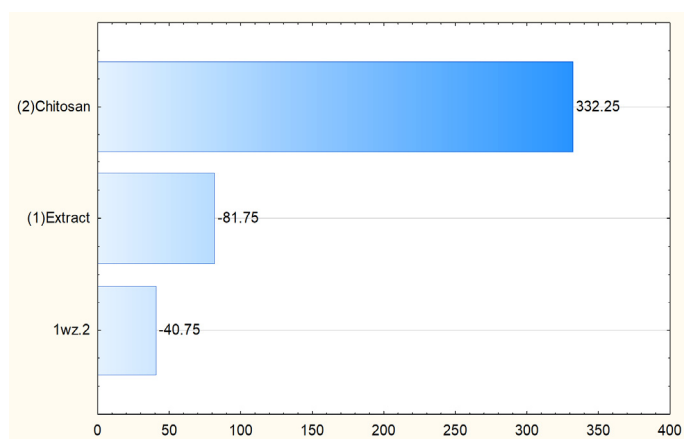

(a)

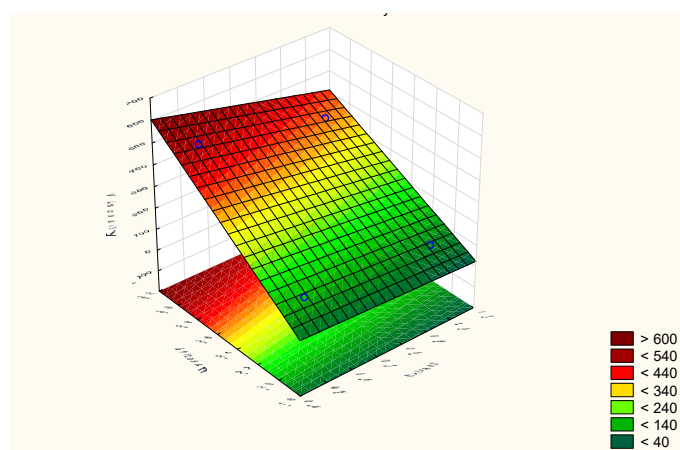

(b)

**Figure S7.** Statistical analysis for hydrogels' viscosity: (a) Pareto plot of standardized effects; (b) Response surface plots presenting the dependence of extract concentration and chitosan concentration on hydrogels' viscosity.**Table S4.** Correlation matrix

|           | DPPH    | Hyal          | Tyr            | Diss.%  | Diss.mg        | Viscosity |
|-----------|---------|---------------|----------------|---------|----------------|-----------|
| DPPH      | 1.0000  | -0.1479       | -0.4240        | -0.5894 | 0.6419         | -0.0369   |
| Hyal      | -0.1479 | 1.0000        | <b>0.9544</b>  | -0.4396 | -0.8510        | 0.7779    |
| Tyr       | -0.4240 | <b>0.9544</b> | 1.0000         | -0.1782 | <b>-0.9665</b> | 0.6663    |
| Diss.%    | -0.5894 | -0.4396       | -0.1782        | 1.0000  | -0.0073        | -0.7729   |
| Diss.mg   | 0.6419  | -0.8510       | <b>-0.9665</b> | -0.0073 | 1.0000         | -0.5837   |
| Viscosity | -0.0369 | 0.7779        | 0.6663         | -0.7729 | -0.5837        | 1.0000    |

statistically significant relationships are marked in red
